# Supplementary figures and images for: Modest effects of dietary supplements during the COVID-19 pandemic: insights from 445 850 users of the COVID-19 Symptom Study app
Source: HighWire-hosted journal article supplement (doi:10.1136/bmjnph-2021-000250), 2021-04-19

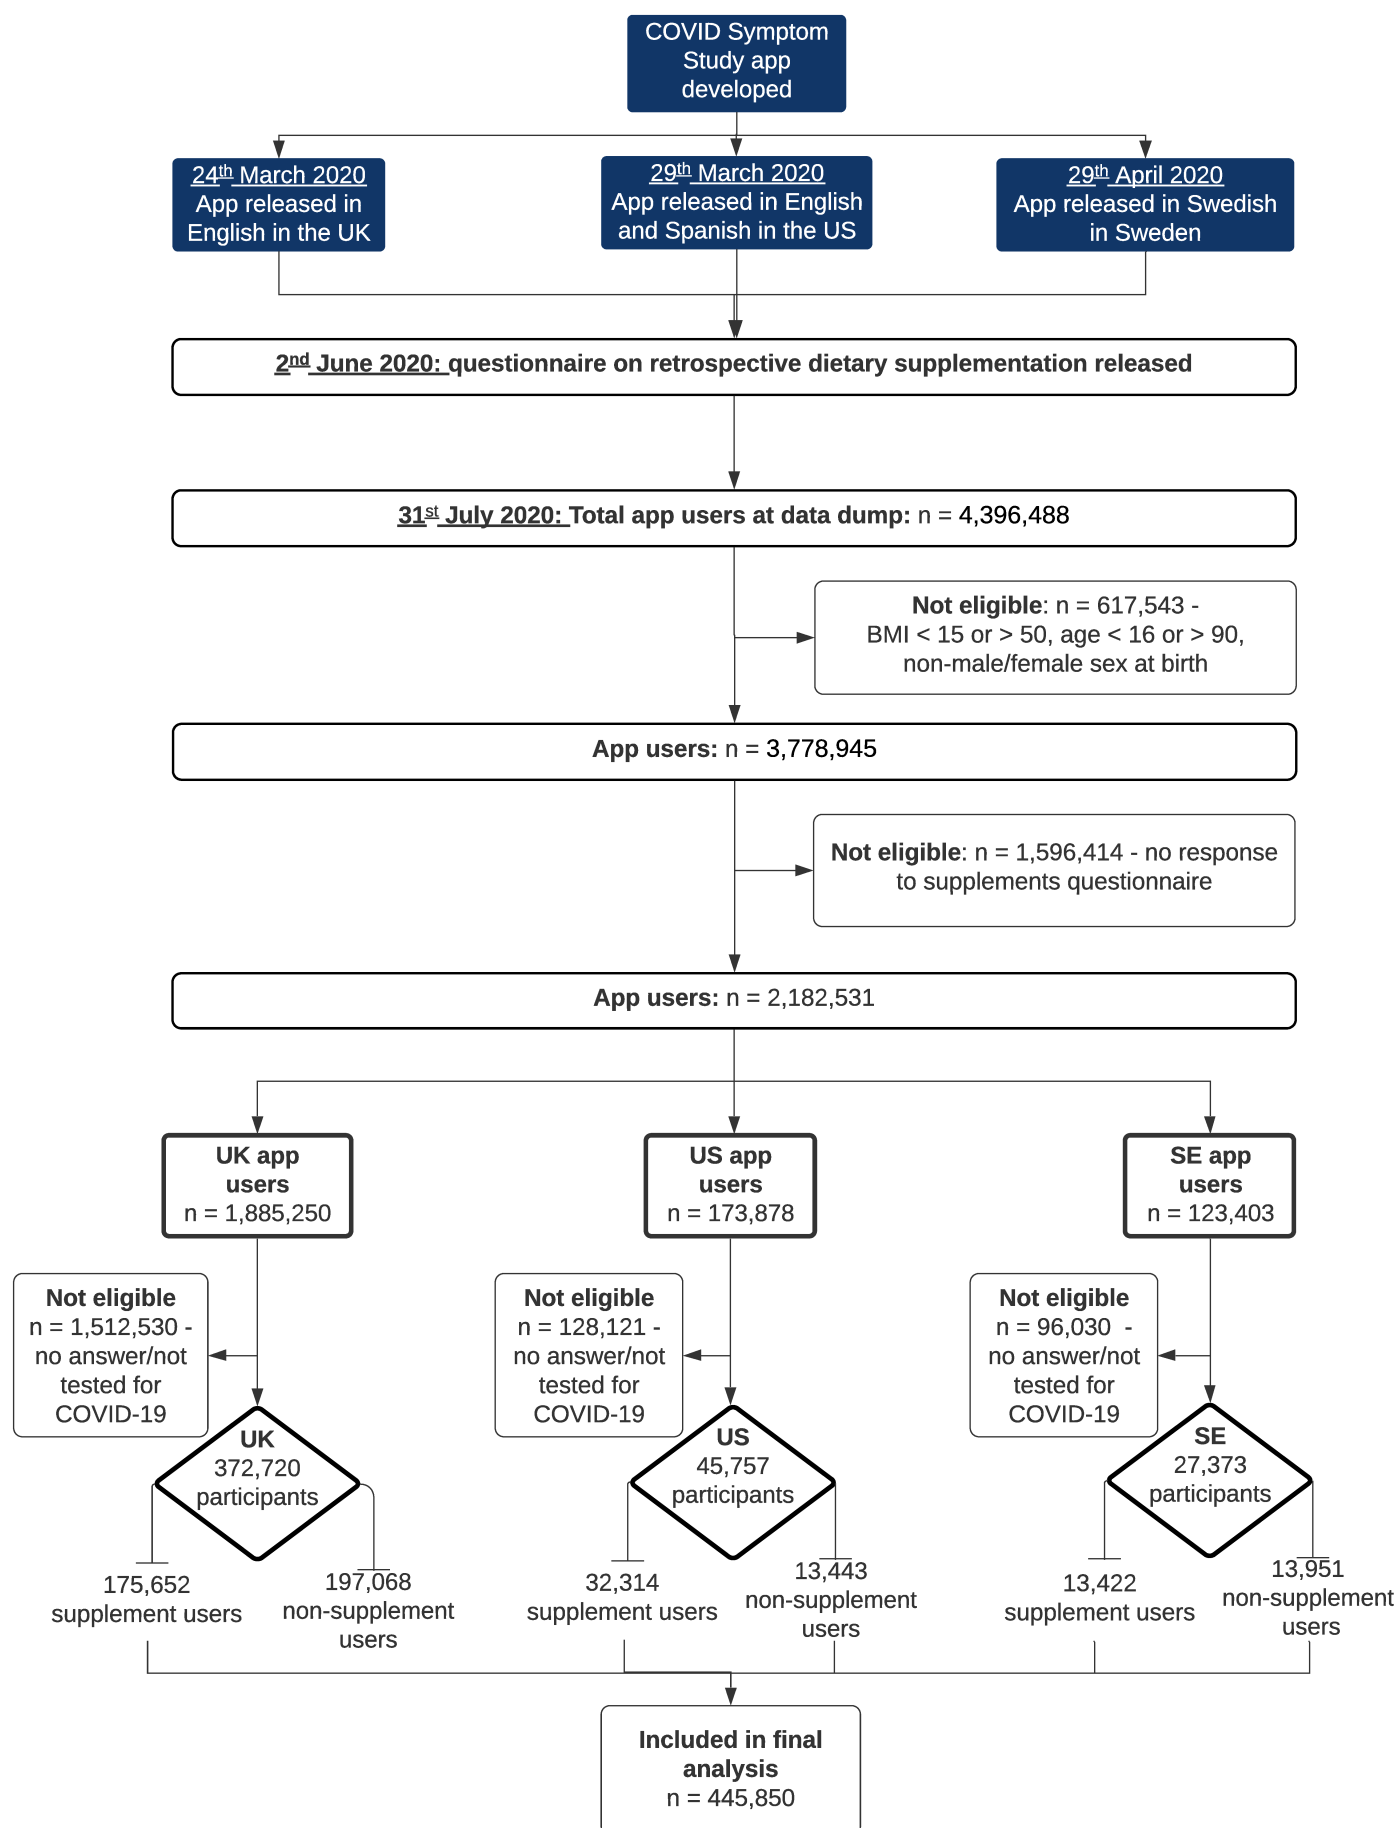

Supplement: bmjnph-2021-000250supp001_data_supplement.pdf [file bmjnph-2021-000250supp001_data_supplement.pdf]
